# Supplementary material
Source: Springer Nature journal article supplement (https://www.springermedizin.de/resource/supplementary/13048_2013_192_MOESM1_ESM.pdf/9665098)

**A**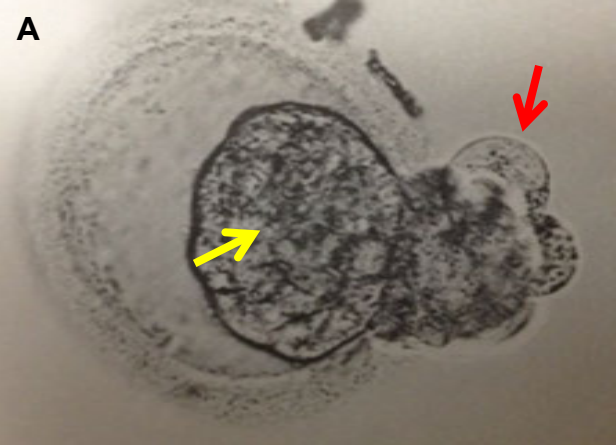**C**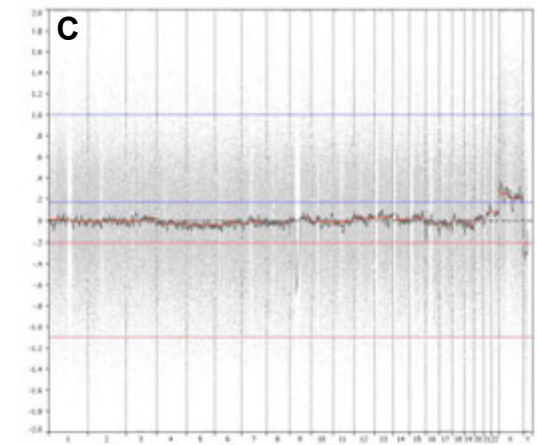

Sample: S4006A06\_2012-09-23T003212\_532 vs Male Control

**B**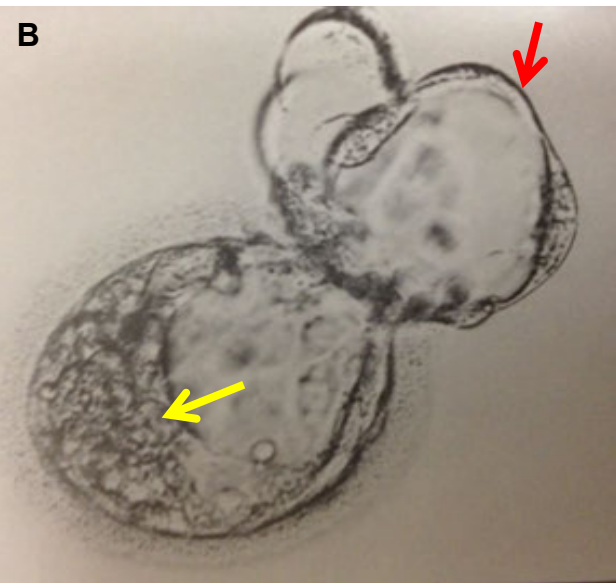**D**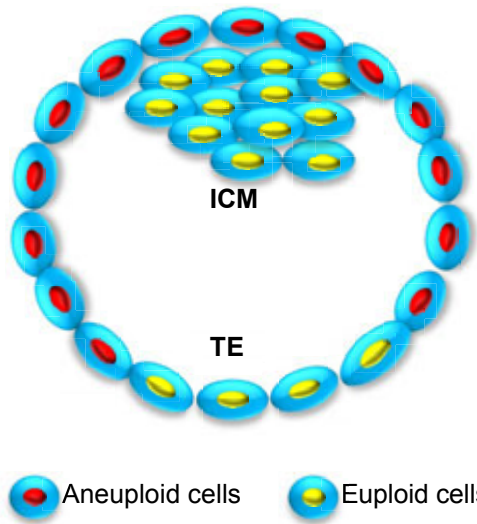

Supplement: MOESM1 [file 9665098]
